# Supplementary material for: In vitro studies of Rickettsia-host cell interactions: Confocal laser scanning microscopy of Rickettsia helvetica-infected eukaryotic cell lines
Source: PubMed Central journal article supplement (PMC5825168; doi:10.1371/journal.pntd.0006151), 2018-02-12
Supplement: pntd.0006151.s002.pdf [file pntd.0006151.s002.pdf]

.....|.....|.....|.....|.....|.....|  
          10          20          30          40          50  
**NP 359747 Rcon** MNLQNSHSHK YVLTFMSTC LLTSSFLSTS ARAASFKDLV SKTPAWEKHN  
**AAT79547 Rric** -----  
**ADH59734 Rpar** -----  
**YP\_002916397 Rpea** -----  
**Rhel AS819** MNLQNSHSHK YVLTFMSTY LLTSSFLSTS ARAASFKDLV SKTPAWEKHN

.....|.....|.....|.....|.....|.....|  
          60          70          80          90          100  
**NP 359747 Rcon** STQQQNIWKD LTPNEKIKKW QEAAALVPSFT QAQNDLGIKY KETDLSSFLD  
**AAT79547 Rric** STQQQNIWKD LTPTEKIKKW QEAAALVPSFT QAQNDLGIKY KETDLSSFLD  
**ADH59734 Rpar** STQQQNIWKD LTPNEKIKKW QEAAALVPSFT QAQNDLGIKY KETDLSSFLD  
**YP\_002916397 Rpea** ATQQQNIWND LTQNEKIKKW QEAAALVPSFT QAHNDLGIKY KETDLSSFLD  
**Rhel AS819** SKQQ\*NIWKD FTPNEKIKKW QEADLIPSFS QAQDDLGIKY KETDLSSFLD

.....|.....|.....|.....|.....|.....|  
          110          120          130          140          150  
**NP 359747 Rcon** NTRHKARQAR AEILLYIERV KQQDFDTPKQ AYINQGVVPT DIEAATNLGI  
**AAT79547 Rric** NTRHKARQAR AEILLYIERI KQQDFDTPKQ AYINQGVVPT DIEAATNLGI  
**ADH59734 Rpar** NTRHKARQAR AEILLYIERV KQQDFDTPKQ EYINQGVVPT DIEAATNLGI  
**YP\_002916397 Rpea** NTRHKARQAR AKILLYIERV KQQDFDTPKQ EYINQGVVPT DIEAATNLGI  
**Rhel AS819** NTRHKARQAR AKILLYIERV KQQDFDTPKQ EYIKQGVVPT DMEAATNLGI

.....|.....|.....|.....|.....|.....|  
          160          170          180          190          200  
**NP 359747 Rcon** SYDPSKIDNN VEHDQKVRRA EKDKKAVIEL YVSSINRGIK YKHYVDNDII  
**AAT79547 Rric** SYDPSKIDHN VEHDQKVRRA EKDKKAVIEL YISSINRDIK YKHYVDNDII  
**ADH59734 Rpar** SYDPSKIDNK VEHDQKVRRA EKDKKAVIEL YISSINRGIK YKHYVDNDII  
**YP\_002916397 Rpea** SYDPSKIDNN VEHDQKVRRA EKDKKAVIEL YISSINRDIK YKHYVDNDII  
**Rhel AS819** SYDPSKIDNN IEKQKVRRA EKDKKAVIDL YISSINRDIK YKHYVDNDII

.....|.....|.....|.....|.....|.....|  
          210          220          230          240          250  
**NP 359747 Rcon** PEIQEVRTAL NMNKDDAQSF VASIRTEIME NAKGQYIADS HIPTEKELKK  
**AAT79547 Rric** PEMQEVRTAL NMNKDDAQSF VASIRTEIME NAKGQYIADS HIPTEKELKK  
**ADH59734 Rpar** PEMQEVRTAL NMNKDDAQSF VASIRTEIME NAKGQYIADS HIPTEKELKK  
**YP\_002916397 Rpea** PELQEVRTAL NMNKDDAQSF VASIRTEIME NAKGQYIADS HIPTEKELKK  
**Rhel AS819** PKMKEVRTAL NINKDDAESF IGSIRTEIME NAKG\*YIADS LFLQKKS\*SR

.....|.....|.....|.....|.....|.....|  
          260          270          280          290          300  
**NP 359747 Rcon** KFGISRDDNR DGYIKSIRLK VMDKEKPQYI ADSHIPTEKE LEQKFGADKG  
**AAT79547 Rric** KFGISRDDNR DGYIKSIRLK VMENAKGQYI ADSHIPTEKE LEQKFGADKG  
**ADH59734 Rpar** KFGISRDDNR DGYIKSIRLK VMDKEKPQYI ADSHIPTEKE LEQKFGVDKG  
**YP\_002916397 Rpea** KFGISRDDNR DGYIKSIRLK VMDKEKPQYI ADNHIPTKE LEQKFGADKG  
**Rhel AS819** NLVLIKVRQQ TISHQ\*KLR\* CLVKNRTI\*I IILSLTLTN\* \*MNLR\*GK\*K

.....|.....|.....|.....|.....|.....|  
          310          320          330          340          350  
**NP 359747 Rcon** EATNYIASIA TQMMLDKKSY YIDNNIIPNA DELMNEFKIG PVKATSYINQ  
**AAT79547 Rric** EATNYIASIA TQMMLGKKS YIDNNIIPNT DELMNEFNIG PVKATSYINQ  
**ADH59734 Rpar** EATNYIASIA TQMMLGKKS YIDNNIIPNA DELMNEFKIG PVKATSYINQ  
**YP\_002916397 Rpea** EATNYIAS--  
**Rhel AS819** QILI\*NK\*EP E\*NQFLNND TTKPSALDAL KKRAGPKVII GICQIKVQII

.....|.....|.....|.....|.....|.....|  
          360          370          380          390          400  
**NP 359747 Rcon** IRAGIEANQF LNNNDTTKPS TGRSQKSGS KNDHWYMSNQ SINNTGTSAR  
**AAT79547 Rric** IRAGIEAKQF LNNNDTTKPS TGHSQKSGS KNDHWYMSNQ SINDTGTSSR  
**ADH59734 Rpar** IKAGIEANQF LNNNDTTKPS TGRSQKSGS KNNPWYMSNQ SIHNTTSSQ  
**YP\_002916397 Rpea** IRAGIEANQF LNNNDTTKPS TGRSQKSGS KNDHWYMSNQ SINDTRTSSR  
**Rhel AS819** QEHLRGCEPK RNNHILLIL\* VLLKLTLLIK KVRVI\*LKLN TI\*IE\*YNNK

.....|.....|.....|.....|.....|.....|  
          410          420          430          440          450  
**NP 359747 Rcon** IVTGREKKQR YFFDPISITFK TYFNTKASKG NLTQSQHNNIN RIIQQEENIE  
**AAT79547 Rric** IFTGREKKQR YFFDPISITFK THFNTKASKG NLTQSQHTIK RIIQQEENIA  
**ADH59734 Rpar** ISTGRDKKQR YFFDSISITFK TQFNAKANKG NLTLSQQNNIN KLIEQEENIE  
**YP\_002916397 Rpea** IFTGRAKKQR YFFDPISITFK THFNTKANKG NLTQSQHNNIN RIIQQEENIE  
**Rhel AS819** KNIEEFKNLI KTDVVAALNL KVDSSYKKEA VNTIFSDFND DTIQKVLFSN
