# Supplementary material for: In vitro studies of Rickettsia-host cell interactions: Confocal laser scanning microscopy of Rickettsia helvetica-infected eukaryotic cell lines
Source: PLoS Negl Trop Dis. 2018 Feb 12;12(2):e0006151. doi: 10.1371/journal.pntd.0006151 (PMC5825168; doi:10.1371/journal.pntd.0006151)
Supplement: S1 Fig — The sequences are trimmed at the end. Red: G-actin binding site; green: WH2 regions; blue: central region; orange: acidic domain. The proline-rich regions are highlighted in grey. A conserved motif can be seen at the end of the sequence, where Ф represents an aliphatic amino acid, X represents any residue, and R is a conserved arginine. Abbreviations: Rhel—R. helvetica, Rak—R. akari, Rmas—R. massiliae, Rrao—R. raoultii, Rfel—R. felis, Rcan—R. canadensis, Rsib—R. sibirica, Rafr—R. africae, Rcon—R. conorii, Rric—R. rickettsii, Rslo—R. slovaca, Rmon—R. monacensis. (PDF) [file pntd.0006151.s001.pdf]

10 20 30 40 50 60 70 80 90 100  
Rhel AS819 -----MAKEIDINKLLAQENNALNTILSQVNKLCEQNKKLGGLIEIQNETKELEKEHNRSLHWFKRFVKTVSNVKYIFIKSEEQLTNEAIKYN  
WP\_010421970 Rhel C9P9 -----MAKEIDINKLLAQENNALNTILSQVNKLCEQNKKLGGLIEIQNETKELEKEHNRSLHWFKRFVKTVSNVKYIFIKSEEQLTNEAIKYN  
YP\_001493700 Rak -----MAQEIDINKLLAQENNALNAILSQVNELCTQNKKLGGLIEIQNETKELEKEHNRSLPWFKRLVKTVSNVKYIFVKSEEQLTNEAIKYN  
YP\_001499560 Rmas -----MYGVAKEIDINKLLAQENNALNTILSQVNELCEQNKQGLGGLIEIQNETKELEKEHNRSLPWFKRLVKTVSNVKYIFIKSEEQLTNEAIKYN  
ACA30404 Rrao -----MYGVAKEIDINKLLAQENNALNTILSQVNELCEQNKQGLGGLIEIQNETKELEKEHNRSLPWFKRFVKTVSNVKYIFIKSEEQLTNEAIKYN  
YP\_246387 Rfel -----MYGVAKEIDINKLLAQENNALNTILSQVNELCEQNKQGLGGLIEIQNETKELEKEHNRSLPWFKRLVKTVSNVKYIFVKSEEQLTNEAIKYN  
MAKETKETKETKETDINKLLTQENNALNTILSQVNELCEQNKQGLGVLEIQNEAKELEKEHNRSLPWFKRFVKTVSNVKYIFIKSEEQLTNEAIKHN  
YP\_001492102 Rcan -----MVKEIDINKLLAQENNALNTILSQVNELCKQNKQGLGGLIEIQNETKELEKEHNRSLPWFKRFVKTVSNVKYILIKSEEQLTNEAIKYN  
ZP\_00142939 Rsaib -----MYGMVKEIDINKLLAQENNALNTILSQVNELCKQNKQGLGGLIEIQNETKELEKEHNRSLPWFKRFVKTVSNVKYILIKSEEQLTNEAIKYN  
YP\_002845437 Rafr -----MYGMVKEIDINKLLAQENNALNTILSQVNELCKQNKQGLGGLIEIQNETKELEKEHNRSLPWFKRFVKTVSNVKYILIKSEEQLTNEAIKYN  
NP\_360546 Rcon -----MVKEIDINKLLAQENNALNAILSHVNELCQNKQGLGGLIEIQNETKELEKEHNRSLPWFKRFVKTVSNVKYILIKSEEQLTNEAIKYN  
YP\_001650281 Rric -----MVKEIDINKLLAQENNALNTILSQVNELCKQNKQGLGGLIEIQNETKELEKEHNRSLPWFKRFVKTVSNVKYILIKSEEQLTNEAIKYN  
AEV92458 Rsls -----MTKEIDINKLLAQENNALNTILSQVNELCEQNKQGLGGLIEIQNETKALEKEYNRSLPWFKRFVNTVSNVKYIFIKSEEQLTNEAIKYN  
Q9AKP3 Rmon -----

110 120 130 140 150 160 170 180 190 200  
G-actin binding site  
Rhel AS819 NKVLKIDINIKIYINIAEKSAPLKQELQEEIKKNFEDLTKKNLSDQQRERLSEVFFSYKSKPERFSALHMTNPLQFINABEELEKQYNSLNATKQNIQNLI  
WP\_010421970 Rhel C9P9 NKVLKIDINIKIYINIAEKSAPLKQELQEEIKKNFEDLTKKNLSDQQRERLSEVFFSYKSKPERFSALHMTNPLQFINABEELEKQYNSLNATKQNIQNLI  
YP\_001493700 Rak NKVLKIDINIKIYINIAEKSAPLKQELQEEIAKNFKDLTKKDLSDQQRERLSEVFFSYKSKPERFSALHMTNPLQFINABEELEKQYNSLNATKQNIQNLI  
YP\_001499560 Rmas NKILKIDINIKIYINIAEKSAPLKQALQAEIEIKFKDLTKKDLSDQQRARVSEVFFSYKSKPERFSALHMTNPLQFINABEELEKQYNSLNATKQNIQNLI  
ACA30404 Rrao NKILKIDINIKIYINIAEKSAPLKQELQEEIEKNFKDLTKKDLSDQQRERLSEVFFSYKSKPERFSALHMTDPLQFINABEELEKQYNSLNATKQNIQNLI  
YP\_246387 Rfel NKILKIDINIKIYINIAEKSAPLKQELQEEIEKNFKDLTKKDLSDQQRERLSEVFFSYKSKPERFSALHMTNPLQFINABEELEKQYNSLNATKQNIQNLI  
YP\_001492102 Rcan TKILKIDINIKIYINIAEKSAPLKQALQAEIEKNFEDLTKKDLSDQQRERLAELEFFSYKDKPERFSALHMTNPLQFINABEELEKQYNSLNATKQNIQNLI  
ZP\_00142939 Rsaib NKILKIDINIKIYINIAEKSAPLKQALQAEIEKNFKDLTKKDLSDQQRARLSEVFFSYKSKPERFSALHMTNPLQFINABEELEKQYNSLNATKQNIQNLI  
YP\_002845437 Rafr NRILKIDINIKIYINIAEKSAPLKQALQAEIEKNFKDLTKKDLSDQQRARLSEVFFSYKSKPERFSALHMTNPLQFINABEELEKQYNSLNATKQNIQNLI  
NP\_360546 Rcon NKILKIDINIKIYINIAEKSAPLKQALQAEIEKNFKDLTKKDLSDQQRARLSEVFFSYKSKPERFSALHMTNPLQFINABEELEKQYNSLNATKQNIQNLI  
YP\_001650281 Rric NKILKIDINIKIYINIAEKSAPLKQALQAEIEKSFKDLTKKDLSDQQRARLSEVFFSYKSKPERFSALHMTNPLQFINABEELEKQYNSLNATKQNIQNLI  
AEV92458 Rsls NKILKIDINIKIYINIAEKSAPLKQALQAEIEKNFKDLTKKDLSDQQRARLSEVFFSYKSKPERFSALHMTNPLQFINABEELEKQYNSLNATKQNIQNLI  
Q9AKP3 Rmon NKILKIDINIKIYINIAEKSVSLKQELQEEIEKNFKDLTKKDLSDQQRERLSEVFFSYKSKPERFSALHMTNPLQFINABEELEKQYNSLNATKQNIQNLI

210 220 230 240 250 260 270 280 290 300  
Rhel AS819 NSNIKELKKIQQVAEIREEIPYTFEKLNNIQQNVKQVFNNSQVLAKNKESNTRTIRKIDQLYETKHKFEELIENKERNINDIATKLPDNEELQKI  
WP\_010421970 Rhel C9P9 NSNIKELKKIQQVAEIREEIPYTFEKLNNIQQNVKQVFNNSQVLAKNKESNTRTIRKIDQLYETKHKFEELIENKERNINDIATKLPDNEELQKI  
YP\_001493700 Rak NSNIKELKEIQKQVAEIREEIPYTFEKLNNIQQNVKQVFNNSQVLAKNKESNTRTIRKIDQLYETKHKFEELIENKERNINDIATKLPDNEELQKI  
YP\_001499560 Rmas NSNIKELKEIQKQVAEIREEIPYTFEKLNNIQQNVKQVFNNSQVLAKNKESNTRTIRKIDQLYETKHKFEELIENKERNINDIATKLPDNEELQKI  
ACA30404 Rrao NSNIKELKEIQKQVAEIRAEPVPTTFEKLNNIQQNVKQVFNNSQVLAKNKESNTRTIRKIDQLYETKHKFEELIENKERNINDIATKLPDNEELQKI  
YP\_246387 Rfel NSNIKELKEIQKQVAEIREEIPYTFEKLNNIQQNVKQVFNNSQVLAKNKESNTRTIRKIDQLYETKHKFEELIENKERNINDIATKLPDNEELQKI  
YP\_001492102 Rcan NSNIKELKEIQKQVAEIREEIPHTTFEKLNSIQNVKQVFNNSQVLAKNKESNTRTIRKIDQLYETKHKFEELIENKERNINDIATKLPDNEELQKI  
ZP\_00142939 Rsaib NSNIKELKEIQKQVAEIRAEPVPTTFEKLNNIQQNVKQVFNNSQVLAKNKESNTRTIRKIDQLYETKHKFEELIENKERNINDIATKLPDNEELQKI  
YP\_002845437 Rafr NSNIKELKEIQKQVAEIRAEPVPTTFEKLNNIQQNVKQVFNNSQVLAKNKESNTRTIRKIDQLYETKHKFEELIENKERNINDIATKLPDNEELQKI  
NP\_360546 Rcon NSNIKELKEIQKQVAEIRAEPVPTTFEKLNNIQQNVKQVFNNSQVLAKNKESNTRTIRKIDQLYETKHKFEELIENKERNINDIATKLPDNEELQKI  
YP\_001650281 Rric NSNIKELKEIQKQVAEIRAEPVPTTFEKLNNIQQNVKQVFNNSQVLAKNKESNTRTIRKIDQLYETKHKFEELIENKERNINDIATKLPDNEELQKI  
AEV92458 Rsls NSNIKELKEIQKQVAEIRAEPVPTTFEKLNNIQQNVKQVFNNSQVLAKNKESNTRTIRKIDQLYETKHKFEELIENKERNINDIATKLPDNEELQKI  
Q9AKP3 Rmon NSNVLEKEIQKQVAEIREEIPYTFEKLNNIQQNVKQVFNNSQVLAKNKESNTRTIRKIDQLYETKHKFEELIENKERNINDIATKLPDNEELQKI

310 320 330 340 350 360 370 380 390 400  
Rhel AS819 VSNLTNHMTSKKEPILANSSIAKPLENNIPTPPP-----LPENNIPPPP-----PLPENNIPPPP-----PLPENNIPPPP-----PLPENNIPPPP-----PLPE  
WP\_010421970 Rhel C9P9 VSNLTNHMTSKKEPILANSSIAKPLENNIPTPPP-----LPENNIPPPP-----PLPENNIPPPP-----PLPENNIPPPP-----PLPENNIPPPP-----PLPE  
YP\_001493700 Rak VSNFANHMTSKKEPILTTSSIAKPLENNITRPL-----LSQNNIPSP-----PLSKNNIPSP-----PLPENNIPPPP-----PLPENNIPPPP-----PLPE  
YP\_001499560 Rmas ASNLTNHMTSKKEPILANSSIAKPLENNIPTPPP-----LSQNNIPSP-----PLSKNNIPSP-----PLPENNIPPPP-----PLPENNIPPPP-----PLPE  
ACA30404 Rrao VSNLTNHMTSKKEPILANSSIAKPLENNIPTPPP-----VSNLTNIPSP-----PLPENNIPSP-----PLPENNIPSP-----PLPENNIPSP-----PLPE  
YP\_246387 Rfel VSNLTNHMTSKKEPILTTSSIAKPLENNITRPL-----LTKNNIPSP-----PLSKNNIPSP-----PLPENNIPPPP-----PLPENNIPPPP-----PLPE  
YP\_001492102 Rcan VSNLTNHMTAKKEPILTTSSIAKPLENNIPTPPP-----VSNLTNIPSP-----PLPENNIPSP-----PLPENNIPSP-----PLPENNIPSP-----PLPE  
ZP\_00142939 Rsaib VSNLTNHMTSKKEPILANSSIAKPLENNIPTPPP-----LPENNIPSP-----PLPENNIPSP-----PLPENNIPSP-----PLPENNIPSP-----PLPE  
YP\_002845437 Rafr VSNLTNHMTSKKEPILANSSIAKPLENNIPTPPP-----LPENNIPSP-----PLPENNIPSP-----PLPENNIPSP-----PLPENNIPSP-----PLPE  
NP\_360546 Rcon VSNLTNHMTSKKEPILANSSIAKPLENNIPTPPP-----LPENNIPSP-----PLPENNIPSP-----PLPENNIPSP-----PLPENNIPSP-----PLPE  
YP\_001650281 Rric VSNLTNHMTSKKEPILANSSIAKPLENNIPTPPP-----LPENNIPSP-----PLPENNIPSP-----PLPENNIPSP-----PLPENNIPSP-----PLPE  
AEV92458 Rsls VSNLTNHMTSKKEPILANSSIAKPLENNIPTPPP-----LPENNIPSP-----PLPENNIPSP-----PLPENNIPSP-----PLPENNIPSP-----PLPE  
Q9AKP3 Rmon VSNLTNHMTSKKEPILANSSIAKPLENNIPTPPP-----LPENNIPSP-----PLPENNIPSP-----PLPENNIPSP-----PLPENNIPSP-----PLPE

410 420 430 440 450 460 470 480 490 500  
WH2 regions  
Rhel AS819 NNIPPPP-----PLPENNIPPPP-----MAP--AQETLSKPVEATT-VKKLENQPRPSIDTSDLMKEIVGPK  
WP\_010421970 Rhel C9P9 NNIPPPP-----PLPENNIPPPP-----MAP--AQETLSKPVEATT-VKKLENQPRPSIDTSDLMKEIVGPK  
YP\_001493700 Rak NNIPPPP-----PLPENNIPPPP-----MPT--AQDALSQPVGVTT-VKKLENQPRPSIDTSDLMKEIVGPK  
YP\_001499560 Rmas NNIPSP-----PPPPPPMPTMAPVSAQTETLSKPVEATT-VKKPENQPRPSIDTSDLMKEIVGPK  
ACA30404 Rrao NNIPSP-----PPPPPPMPTMAPASAQTETLSKPVEATT-VKKPENQPRPSIDTSDLMKEIVGPK  
YP\_246387 Rfel NNIPSP-----PPPPPPMPTMAP--AQETLSKPVEATT-VKKLENQPRPSIDTSDLMKEIVGPK  
YP\_001492102 Rcan NNIPSP-----PPPPPPMPTMAP--AQETLSKPVEATT-VKKPENQPRPSIDTSDLMKEIVGPK  
ZP\_00142939 Rsaib NNIPSP-----PPPPPPMPTMAP--AQETLSKPVEATT-VKKLENQPRPSIDTSDLMKEIVGPK  
YP\_002845437 Rafr NNIPSP-----PPPPPPMPTMAP--AQETLSKPVEATT-VKKLENQPRPSIDTSDLMKEIVGPK  
NP\_360546 Rcon NNIPSP-----PPPPPPMPTMAP--AQETLSKPVEATT-VKKLENQPRPSIDTSDLMKEIVGPK  
YP\_001650281 Rric NNIPSP-----PPPPPPMPTMAP--AQETLSKPVEATT-VKKLENQPRPSIDTSDLMKEIVGPK  
AEV92458 Rsls NNIPSP-----PPPPPPMPTMAP--AQETLSKPVEATT-VKKLENQPRPSIDTSDLMKEIVGPK  
Q9AKP3 Rmon NNIPSP-----PPPPPPMPTMAP--AQETLSKPVEATT-VKKLENQPRPSIDTSDLMKEIVGPK

510 520 530 540 550 560 570 580 590 600  
central region acidic domain  
Rhel AS819 NLKRVKEDTKVQDSRDLLQSGIRGEHLKKVVEFDNTGKFPVAHSHSKPAQNVSKPNEIASILARRVAMEMSDSSSS--SGSESDSGNWSDVST--KPK  
WP\_010421970 Rhel C9P9 NLKRVKEDTKVQDSRDLLQSGIRGEHLKKVVEFDNTGKFPVAHSHSKPAQNVSKPNEIASILARRVAMEMSDSSSS--SGSESDSGNWSDVST--KPK  
YP\_001493700 Rak NLKRVKEDTKVQDSRDLLQSGIRGEHLKKVVEFDNTGKFPVAHSHSKPAQNVSKPNEIASILARRVAMEMSDSSSS--SGSESDSGNWSDVST--KPK  
YP\_001499560 Rmas NLKRVKEDTKVQDSRDLLQSGIRGEHLKKVVEFDNTGKFPVAHSHSKPAQNVSKPNEIASILARRVAMEMSDSSSS--SGSESDSGNWSDVST--KPK  
ACA30404 Rrao NLKRVKEDTKVQDSRDLLQSGIRGEHLKKVVEFDNTGKFPVAHSHSKPAQNVSKPNEIASILARRVAMEMSDSSSS--SGSESDSGNWSDVST--KPK  
YP\_246387 Rfel NLKRVKEDTKVQDSRDLLQSGIRGEHLKKVVEFDNTGKFPVAHSHSKPAQNVSKPNEIASILARRVAMEMSDSSSS--SGSESDSGNWSDVST--KPK  
YP\_001492102 Rcan NLKRVKEDTKVQDSRDLLQSGIRGEHLKKVVEFDNTGKFPVAHSHSKPAQNVSKPNEIASILARRVAMEMSDSSSS--SGSESDSGNWSDVST--KPK  
ZP\_00142939 Rsaib NLKRVKEDTKVQDSRDLLQSGIRGEHLKKVVEFDNTGKFPVAHSHSKPAQNVSKPNEIASILARRVAMEMSDSSSS--SGSESDSGNWSDVST--KPK  
YP\_002845437 Rafr NLKRVKEDTKVQDSRDLLQSGIRGEHLKKVVEFDNTGKFPVAHSHSKPAQNVSKPNEIASILARRVAMEMSDSSSS--SGSESDSGNWSDVST--KPK  
NP\_360546 Rcon NLKRVKEDTKVQDSRDLLQSGIRGEHLKKVVEFDNTGKFPVAHSHSKPAQNVSKPNEIASILARRVAMEMSDSSSS--SGSESDSGNWSDVST--KPK  
YP\_001650281 Rric NLKRVKEDTKVQDSRDLLQSGIRGEHLKKVVEFDNTGKFPVAHSHSKPAQNVSKPNEIASILARRVAMEMSDSSSS--SGSESDSGNWSDVST--KPK  
AEV92458 Rsls NLKRVKEDTKVQDSRDLLQSGIRGEHLKKVVEFDNTGKFPVAHSHSKPAQNVSKPNEIASILARRVAMEMSDSSSS--SGSESDSGNWSDVST--KPK  
Q9AKP3 Rmon NLKRVKEDTKVQDSRDLLQSGIRGEHLKKVVEFDNTGKFPVAHSHSKPAQNVSKPNEIASILARRVAMEMSDSSSS--SGSESDSGNWSDVST--KPK

Conserved sequence 0XX0XX0XXXXXX0
